# Supplementary material
Source: Springer Nature journal article supplement (https://www.springermedizin.de/resource/supplementary/13034_2011_150_MOESM1_ESM.pdf/9652424)

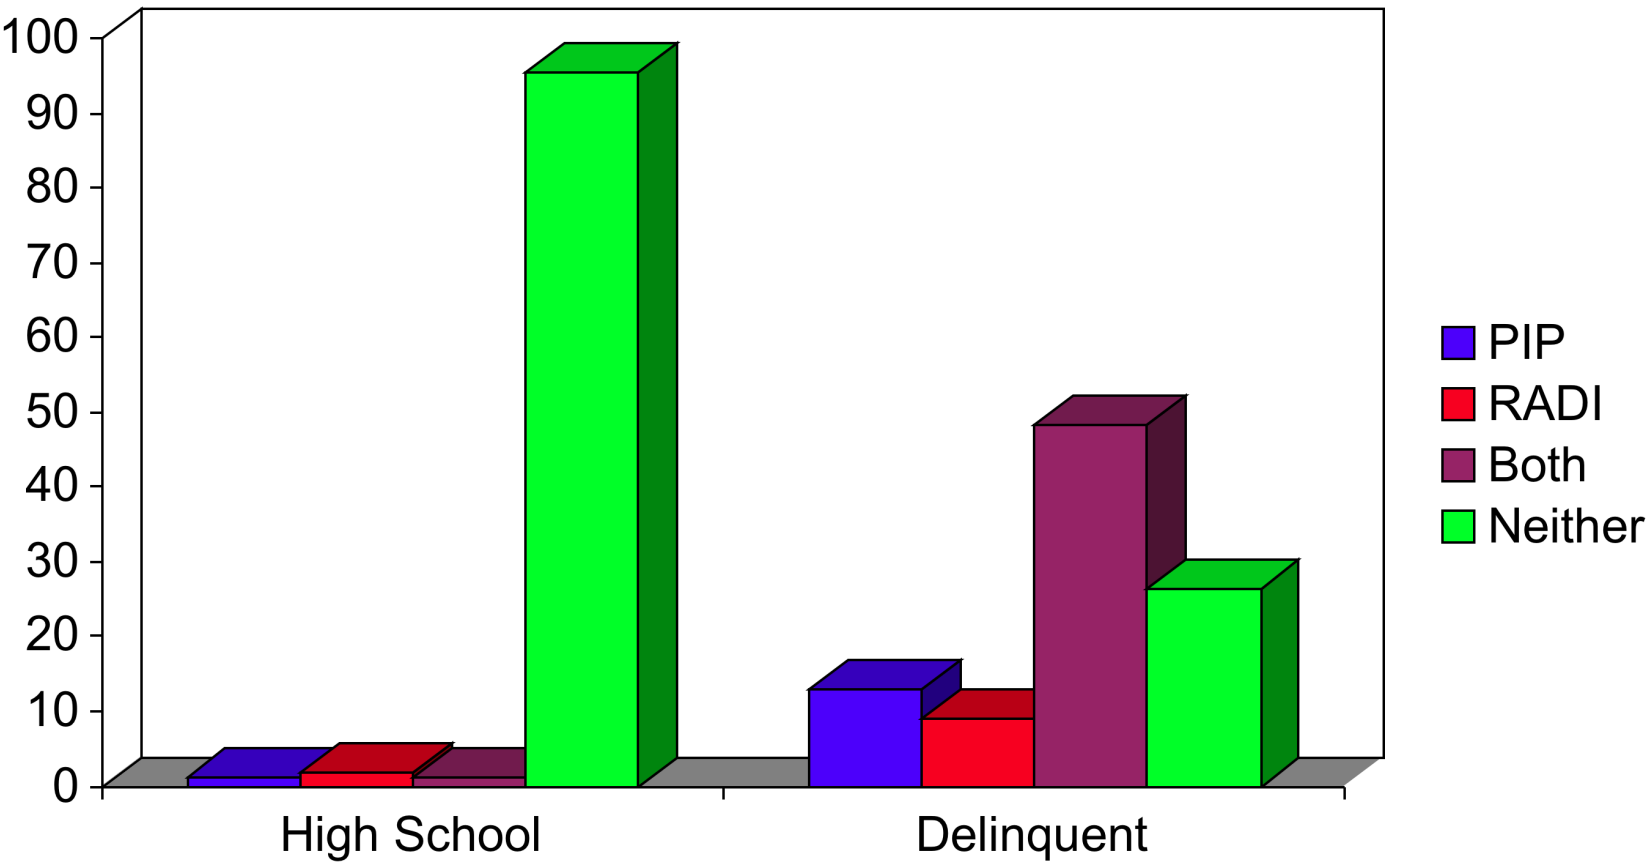

Supplement: MOESM1 [file 9652424]
